# Supplementary material for: Physiological and Molecular Characterization of Biosurfactant Producing Endophytic FungiXylaria regalisfrom the Cones ofThuja plicataas a Potent Plant Growth Promoter with Its Potential Application
Source: Hindawi journal article supplement (doi:10.1155/2018/7362148), 2018-05-13
Supplement: f1 [file 7362148.f1.pdf]

## Supplementary Figures

Supplementary Figure 1

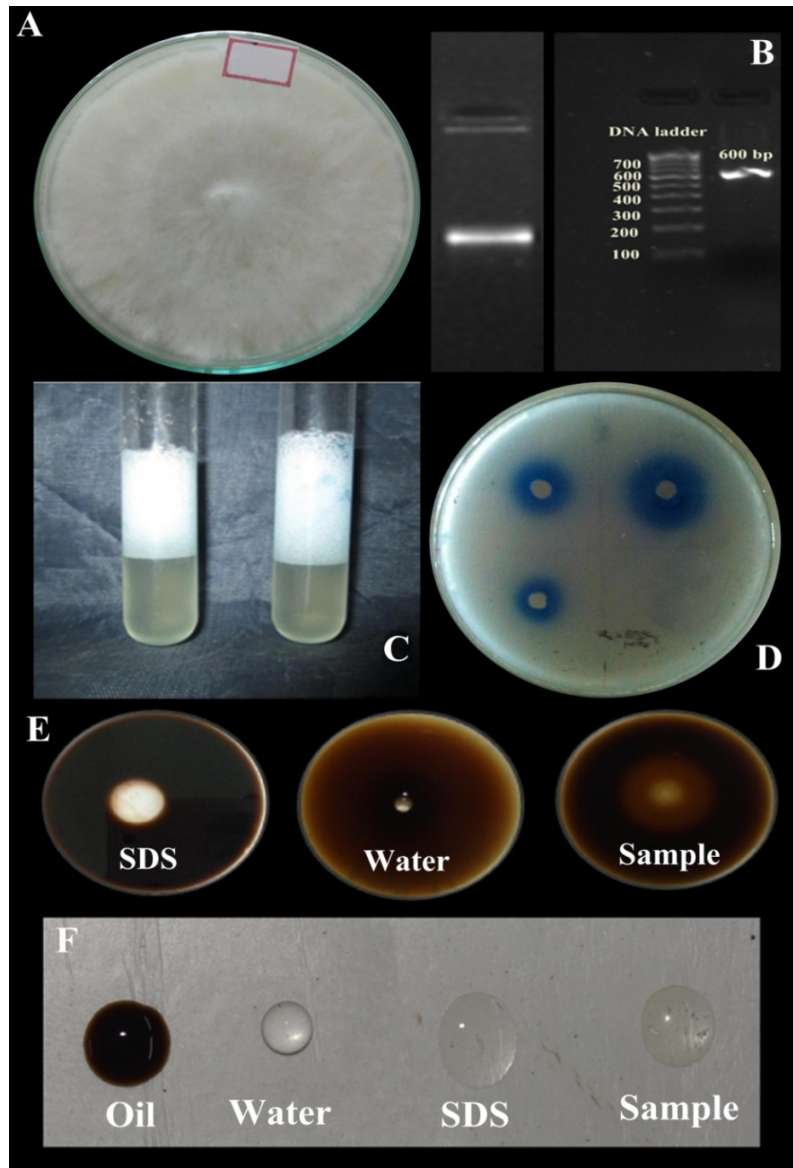

**Supplementary Figure 1:** A) Purified endophytic fungi on PDA B) Isolation and amplification of DNA by PCR C) Emulsification index test D) Blue agar assay E) Oil spreading assay F) Drop collapse assay

**Supplementary Figure 2**

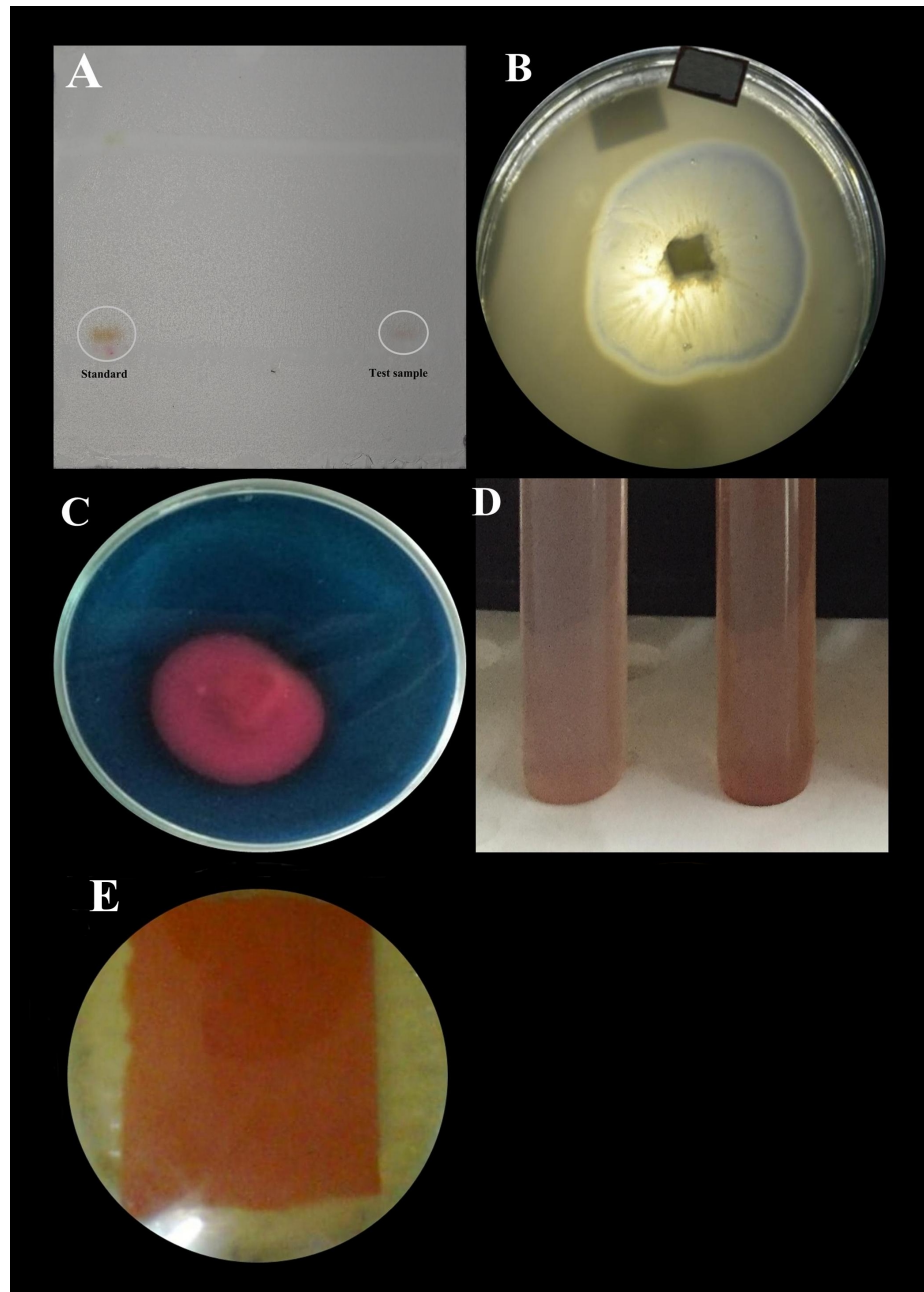

**Supplementary Figure 2: A) HPTLC analysis of extracted IAA from *X. regalis* B) Phosphate solubilization C) Siderophore production D) Hydroxamate type siderophore production E) HCN production.**
